**Title:** Thalamic state influences timing and feature selectivity in the thalamocortical circuit

**Authors:** Clarissa J Whitmire, Yi Juin Liew, Garrett B Stanley

**Affiliation:** Wallace H Coulter Department of Biomedical Engineering, Georgia Institute of Technology and Emory University, Atlanta, GA.

**Contact info:** Correspondence should be addressed to:  
Professor Garrett B. Stanley  
Coulter Department of Biomedical Engineering  
Georgia Institute of Technology & Emory University  
313 Ferst Drive  
Atlanta, GA 30332  
Phone: 404.385.5037  
Email: [Garrett.stanley@bme.gatech.edu](mailto:Garrett.stanley@bme.gatech.edu)

**Keywords:** thalamocortical, feature selectivity, thalamic state, burst/tonic

**Acknowledgements:** Confocal imaging was performed at the Georgia Tech IBB Imaging Core. We thank Peter Y Borden, Christian Waiblinger, and Aurélie Pala for helpful comments on the data analysis and manuscript.

**Author Contributions:** Conceptualization, C.J.W. and G.B.S.; Formal Analysis, C.J.W.; Investigation, C.J.W. and Y.J.L.; Writing – Original Draft, C.J.W. and G.B.S.; Writing – Review & Editing, C.J.W., Y.J.L., & G.B.S.; Visualization, C.J.W.;

**Declaration of Interest:** The authors declare no competing financial interests.

## 1 **Summary**

2 Thalamic neurons dynamically encode sensory information in a state-dependent manner as a  
3 mechanism for gating information flow to the cortex. Here, we investigated the role of thalamic  
4 state on precise feature selectivity in the thalamocortical circuit of the rat vibrissa pathway. In  
5 thalamic neurons, tonic spike triggered averaging revealed clear feature selectivity, while the  
6 feature selectivity associated with burst spikes could not be recovered with this approach.  
7 These thalamic state dependent changes propagated to cortex such that the cortical feature  
8 selectivity was diminished during the optogenetically hyperpolarized (burst biased) thalamic  
9 condition. Further analysis revealed that the perceived loss of feature selectivity was likely not  
10 due to a true loss of stimulus selectivity but instead to changes in the precision of the temporal  
11 spiking in burst firing modes. Therefore, alterations to thalamic state enable a dynamic  
12 interplay between spike timing and spike rate that shapes stimulus encoding in the  
13 thalamocortical circuit.

## 14 **Introduction**

15           Sensory thalamus plays a critical role in gating information flow from our sensors in  
16 the periphery to sensory cortex, ultimately shaping how we perceive the world. Importantly,  
17 thalamic gating properties are not static, but instead vary dynamically through a range of  
18 modulatory mechanisms, including local membrane and synaptic properties (Wolfart et al.,  
19 2005), stimulus history (Whitmire et al., 2016), and neuromodulatory inputs from brainstem  
20 and cortex (Castro-alamancos, 2002; Mease et al., 2014). Although arising from different  
21 mechanisms, these modulatory inputs have the net effect of altering the baseline membrane  
22 polarization level in the thalamus, which we refer to here as “thalamic state”, which plays an  
23 important role in determining the encoding properties of the thalamic neurons that serve as  
24 primary inputs to sensory cortex. Perhaps most prominently, modulation of the baseline  
25 membrane potential in thalamic neurons enables distinct tonic and burst firing modes due to  
26 the selective engagement of low threshold calcium channels during prolonged  
27 hyperpolarization (Suzuki and Rogawski, 1989). In addition to their roles in thalamocortical  
28 oscillations (Steriade et al., 1993), it has long been posited that these two firing modes could  
29 be a mechanism for dynamically controlling information processing (Sherman 2001). At the  
30 thalamocortical synapse, spontaneous burst spikes are more effective at driving cortical  
31 spiking (Swadlow and Gusev, 2001) and evoke larger cortical depolarizations (Bruno and  
32 Sakmann, 2006) than tonic spikes. It has been proposed that both burst and tonic spikes carry  
33 stimulus information (Reinagel et al., 1999), but the relationship between burst and tonic firing  
34 in representing temporal stimulus information in tactile encoding remains unclear.

35           In the visual pathway, the role of thalamic state in sensory processing has identified  
36 distinct sensory selectivity associated with burst versus tonic firing (Alitto et al., 2005; Denning  
37 and Reinagel, 2005; Lesica and Stanley, 2004; Reinagel et al., 1999; Wang et al., 2007). The  
38 burst response can be reliably elicited across trials in response to sensory stimulation (Lesica  
39 and Stanley, 2004; Martinez-Conde et al., 2002; Wang et al., 2007) and the feature selectivity  
40 of the bursts are characterized by a prolonged inhibitory stimulus before the depolarizing input  
41 that occurs immediately prior to the spike onset. This demonstrated that bursting activity is not

42 just an indicator of state, but it is also repeatably evoked by the sensory stimulation and is  
43 present in the awake animal (Guido and Weyand, 1995). However, how these results extend  
44 to other sensory modalities, such as touch, and the implication for downstream sensory  
45 encoding remains unknown.

46 Here, we quantified the role of thalamic state on temporal feature selectivity in the  
47 thalamocortical circuit of the rodent whisker pathway by implementing a class of models that  
48 maps sensory inputs to observed neuronal activity. Specifically, we characterized neurons  
49 using a two-stage, linear-nonlinear framework, the first stage of which represents the sensory  
50 feature selectivity, and the second stage of which represents the overall sensitivity of the input-  
51 output relationship. This characterization was performed for neurons recorded extracellularly  
52 both in the ventro posterior-medial (VPM) thalamus and in layer 4 of primary somatosensory  
53 cortex (S1) in the fentanyl-anesthetized rat. For thalamic neurons, we found that tonic spiking  
54 was associated with clear whisker-stimulus feature selectivity consistent with previous findings  
55 (Petersen et al., 2008). However, analysis of burst firing suggested a lack of feature selectivity,  
56 a finding which was further confirmed using optogenetic hyperpolarization of VPM to switch  
57 the thalamus into a burst state. An assessment of the temporal precision of the sensory-driven  
58 thalamic firing identified an increase in the timing jitter of burst spikes relative to tonic spikes  
59 that could underlie the differences in the recoverability of the feature selectivity. In the cortical  
60 neurons, we found that when thalamus was dominated by tonic firing, the cortical neurons  
61 exhibited similar feature selectivity as observed in VPM. However, when the thalamus was  
62 optogenetically hyperpolarized to push the local thalamic population further into a burst firing  
63 mode, this had a detrimental effect on the spike time precision of the downstream cortical  
64 neurons as well as the feature selectivity reflected by the model. Given the sensitivity of the  
65 thalamocortical circuit to precise timing of thalamic projection neurons, the results here  
66 suggest an important relationship between thalamic state, or membrane polarization, and the  
67 dynamic regulation of timing fidelity across thalamic firing modes that could have profound  
68 implications for coding during varying behavioral conditions.

69 **Methods**

70 **Experimental Procedures**

71 **Acute Surgery:** All procedures were approved by the Georgia Institute of Technology  
72 Institutional Animal Care and Use Committee and were in agreement with guidelines  
73 established by the National Institutes of Health. 19 female albino rats (Sprague-Dawley, 250-  
74 300g) were anesthetized intravenously using a fentanyl cocktail (fentanyl (5 µg/kg), midazolam  
75 (2 mg/kg), dexmedetomidine (150 µg/kg)). A craniotomy was performed over VPm (2-4 mm  
76 caudal to bregma, 1.5-3.5 mm lateral to the midline), and in a subset of animals, a second  
77 craniotomy was performed over S1 (1-3 mm caudal to bregma, 4.5-6 mm lateral to the  
78 midline). At the termination of the experiment, the animal was euthanized with an overdose of  
79 sodium pentobarbital (euthasol, 0.5 mL at 390 mg/mL). All optogenetically transfected animals  
80 that underwent cortical probe recordings were perfused and their brains were imaged for  
81 verification of opsin location and cortical probe location.

82 **Electrophysiology:** Tungsten microelectrodes were lowered into the thalamus (depth: 4.5-6  
83 mm) using either a micropositioner (Kopf, Luigs-Neumann). Multielectrode probes (A1x32-  
84 10mm-50-177, NeuroNexus) were lowered perpendicular to S1 (45° relative to vertical; depth:  
85 2 mm). The topographic location of the electrode was identified through manual stimulation of  
86 the whisker pad. Upon identification of the primary whisker for the recorded unit(s), the primary  
87 whisker was threaded into the galvo motor to permit stimulation of a single whisker.

88 **Sensory Stimulus:** Mechanical whisker stimulation was delivered using a precisely controlled  
89 galvo motor (Cambridge Technologies, custom Matlab software). The mechanical stimulus  
90 applied to the whisker in the rostral-caudal direction consisted of sensory white noise (low  
91 pass filtered at 200 Hz, standard deviation of the noise was 0.6° or 223°/s). Feedback from  
92 the whisker stimulator were used for further spike triggered analysis across all units (down  
93 sampled to 4.88 kHz).

94 **Optogenetics surgeries:** All surgical procedures followed sterile protocol. A small craniotomy  
95 was made above VPm (3 mm lateral, 3 mm caudal to bregma). A 10  $\mu$ L syringe (Neuros  
96 Syringe, Hamilton, Inc) filled with the virus (rAAV5-CamKIIa-Jaws-KGC-GFP-ER2 or rAAV5-  
97 CamKIIa-eNpHR3.0-EYFP, UNC Viral Vector Core Services) was lowered to depth of 5.2 mm  
98 before injecting 1  $\mu$ L of virus at a rate of 0.2  $\mu$ L/min (iSi system, Stoelting). The syringe  
99 remained in place for five minutes after the injection was complete to allow the virus to diffuse.  
100 Opsin expression was fully realized at 2-3 weeks post-surgery.

101 **Optogenetic Stimulus:** Optical manipulation was administered with a controlled pulse of light  
102 through a custom optrode consisting of an optical fiber (200 $\mu$ m diameter; Thorlabs) and an  
103 electrode (Tungsten microelectrode; FHC) that was lowered into the VPm. Upon identifying a  
104 whisker sensitive cell, light sensitivity was assessed by the post-inhibitory rebound spiking  
105 response using a train of 250 millisecond light pulses ( $\lambda$  = 590 or 617nm for Halorhodopsin  
106 and Jaws, respectively). The whisker was then stimulated without (baseline) and with  
107 (hyperpolarized) light provided directly to the thalamus (50 mW/mm<sup>2</sup>). Optogenetic stimulus  
108 conditions (light on/hyperpolarized, light off/baseline) were interleaved to avoid long-term  
109 adaptation effects.

110 **Analytical Methods:** Spike sorting for single channel recordings was performed online and  
111 validated offline using Waveclus (Quiroga et al., 2004). Spike sorting for multichannel  
112 electrodes was performed offline using the KlustaKwik software suite (Rossant et al., 2015).  
113 Isolation of the unit was confirmed by the waveform amplitude (absolute and relative to the  
114 background noise >3) and the interspike-interval distributions (VPm: mean of 0.22%, S1:  
115 mean of 0.38% of spikes in absolute refractory period of 1ms).

116 Feature selectivity was estimated for each recorded unit using the spike triggered average  
117 (STA) (Schwartz et al., 2006).

118 
$$STA = \frac{1}{N} \sum_j s(t_j)$$

119 Where  $N$  is the number of spikes and  $s$  is the stimulus segment in a window surrounding each  
120 spike (-30 to +5 ms, spike-triggered ensemble, STE). The burst and tonic triggered averages  
121 were computed from burst and tonic spikes, respectively. The baseline/hyperpolarized  
122 condition triggered averages were computed from all spikes in a given stimulus condition. The  
123 bootstrap estimate of the confidence intervals on the spike triggered average was computed  
124 as the +/- 2 standard deviation of this shuffled STA distribution across 500 repetitions  
125 (Schwartz et al., 2006). Note that we implemented multiple techniques of estimating the  
126 feature selectivity of the neurons including spike triggered covariance, generalized linear  
127 models, and nonlinear-input models (McFarland et al., 2013). The results were qualitatively  
128 consistent across all methods employed, so we chose to use spike triggered average  
129 throughout the manuscript due to its simplicity.

130 The signal-to-noise ratio of the recovered STA was quantified as the peak-to-peak amplitude  
131 of the STA within 10 milliseconds of the spike (where the significant filter activity is contained)  
132 divided by the peak-to-peak amplitude of the STA from 30 to 20 milliseconds before the spike  
133 (where there is no expected filter information). An SNR value of 1 means the amplitude of the  
134 STA near the spike time is not different from the amplitude of the noise fluctuations. Therefore,  
135 any units with an SNR value less than 2 were excluded from further analysis.

136 To make comparisons of the feature selectivity across the population of recorded neurons, we  
137 computed a principle component analysis of the recovered STA (Estebanez et al., 2012). The  
138 first two principle components accounted for the majority of the variance (71.8% VPM, 78.4%  
139 S1).

140 The non-linearity ( $P(\text{spike}|y)$ ) was estimated as the ratio of the probability of spike-triggered  
141 stimuli ( $P(y|\text{spike})$ ) to the probability of any stimulus segment in the stimulus ( $P(y)$ ) multiplied  
142 by the mean firing rate of the neuron( $P(\text{spike})$ ) (Schwartz et al., 2006):

143 
$$p(\text{spike}|y) = p(\text{spike}) \frac{p(y|\text{spike})}{p(y)}$$

144 Where  $y$  is defined as the stimulus ( $s$ ) convolved with the feature selectivity of the unit (STA)  
145 (Lesica et al., 2007), referred to as filtered stimulus. For all conditions, the STA was defined  
146 as the baseline or tonic spike triggered average. Throughout the manuscript, we separate the  
147 firing rate ( $p(\text{spike})$ ) from the shape of the non-linearity ( $p(y|\text{spike})/p(y)$ ) to avoid confounding  
148 differences in firing rate with differences in tuning.

149 The precision in the noise evoked firing was estimated for each spike classification (tonic,  
150 burst, baseline, hyperpolarized). The precision was defined as:

151 
$$precision = \sum_{n=-1}^{+1} \tau_{jitter}(n)$$

152 Or the number of spikes with  $\tau_{jitter}$  values of +/- 1 ms duration normalized by the total number  
153 of spikes.  $\tau_{jitter}$  is defined for each spike as the temporal lag ( $t_{lag}$ ) for the peak correlation  
154 between the STA and the stimulus segment surrounding that spike (-30 ms to +5 ms).

155 
$$\tau_{jitter} = \arg \max_{t_{lag}} correlation(STA, s(t_j))$$

156 The  $\tau_{jitter}$  distribution was normalized by the total number of spikes in each condition (tonic,  
157 burst, baseline, hyperpolarized).

158 All pairwise statistical comparisons were computed using a Wilcoxon signed rank test unless  
159 otherwise noted.



## 160 **Results**

### 161 Feature selectivity is conserved across the thalamus and cortex

162 We recorded thalamic and cortical extracellular spiking activity in response to sensory  
163 white noise stimulation of a single whisker in the vibrissa pathway of the fentanyl-anesthetized  
164 rat (Figure 1A, see Methods). We estimated the feature selectivity for each unit as the spike  
165 triggered average (STA), which captures the features of the sensory stimulus that tended to  
166 precede spiking, and the static, point nonlinearity, which captures the translation into  
167 suprathreshold spiking activity (Figure 1B; see methods). Although this quantification was  
168 performed on longer unique noise segments, we also recorded the response to short (4-10  
169 second) frozen white noise segments to examine the response across trials. Figure 1C shows  
170 an example recording from a simultaneously recorded pair of neurons in topographically  
171 aligned regions of the thalamus (left column, ventral posteromedial nucleus, VPM) and cortex  
172 (right column, primary somatosensory cortex, S1) in response to the repeated presentation of  
173 a single frozen white noise segment (top of each column). Across trials, the repeatability of  
174 the response to the noise stimulus is apparent in the raster plot, with clear vertical patterns  
175 across trials. The STA was computed for the thalamic and cortical unit for stimulus segments  
176 from -30 milliseconds prior to the spike to +5 milliseconds afterwards at a 0.2ms resolution  
177 (Figure 1C, bottom. The black dotted line indicates the time of the spike). The VPM STA shows  
178 clear feature selectivity in the 10-15 milliseconds prior to the thalamic spike as evidenced by  
179 the large amplitude of the STA relative to the shuffled case (grey confidence intervals). Beyond  
180 15 milliseconds prior to the spike, the VPM STA is essentially flat and within the confidence  
181 bounds on the shuffled process. This suggests that, on average, the thalamic unit is only  
182 sensitive to the stimulus occurring in the previous 10-15 milliseconds. The S1 unit also  
183 displays feature selectivity as evidenced by the shape and amplitude of the S1 STA  
184 immediately prior to the cortical spike relative to the shuffled case. Although the VPM STA is  
185 nearly ten times as large in amplitude as the S1 STA, the similarity in the temporal dynamics  
186 can be visualized by shifting the VPM STA by 2 milliseconds relative to the S1 STA (Figure

187 1C, bottom, S1 STA black, VPM STA shifted by 2 milliseconds and scaled by a factor of 0.1  
 188 as grey dashed line).

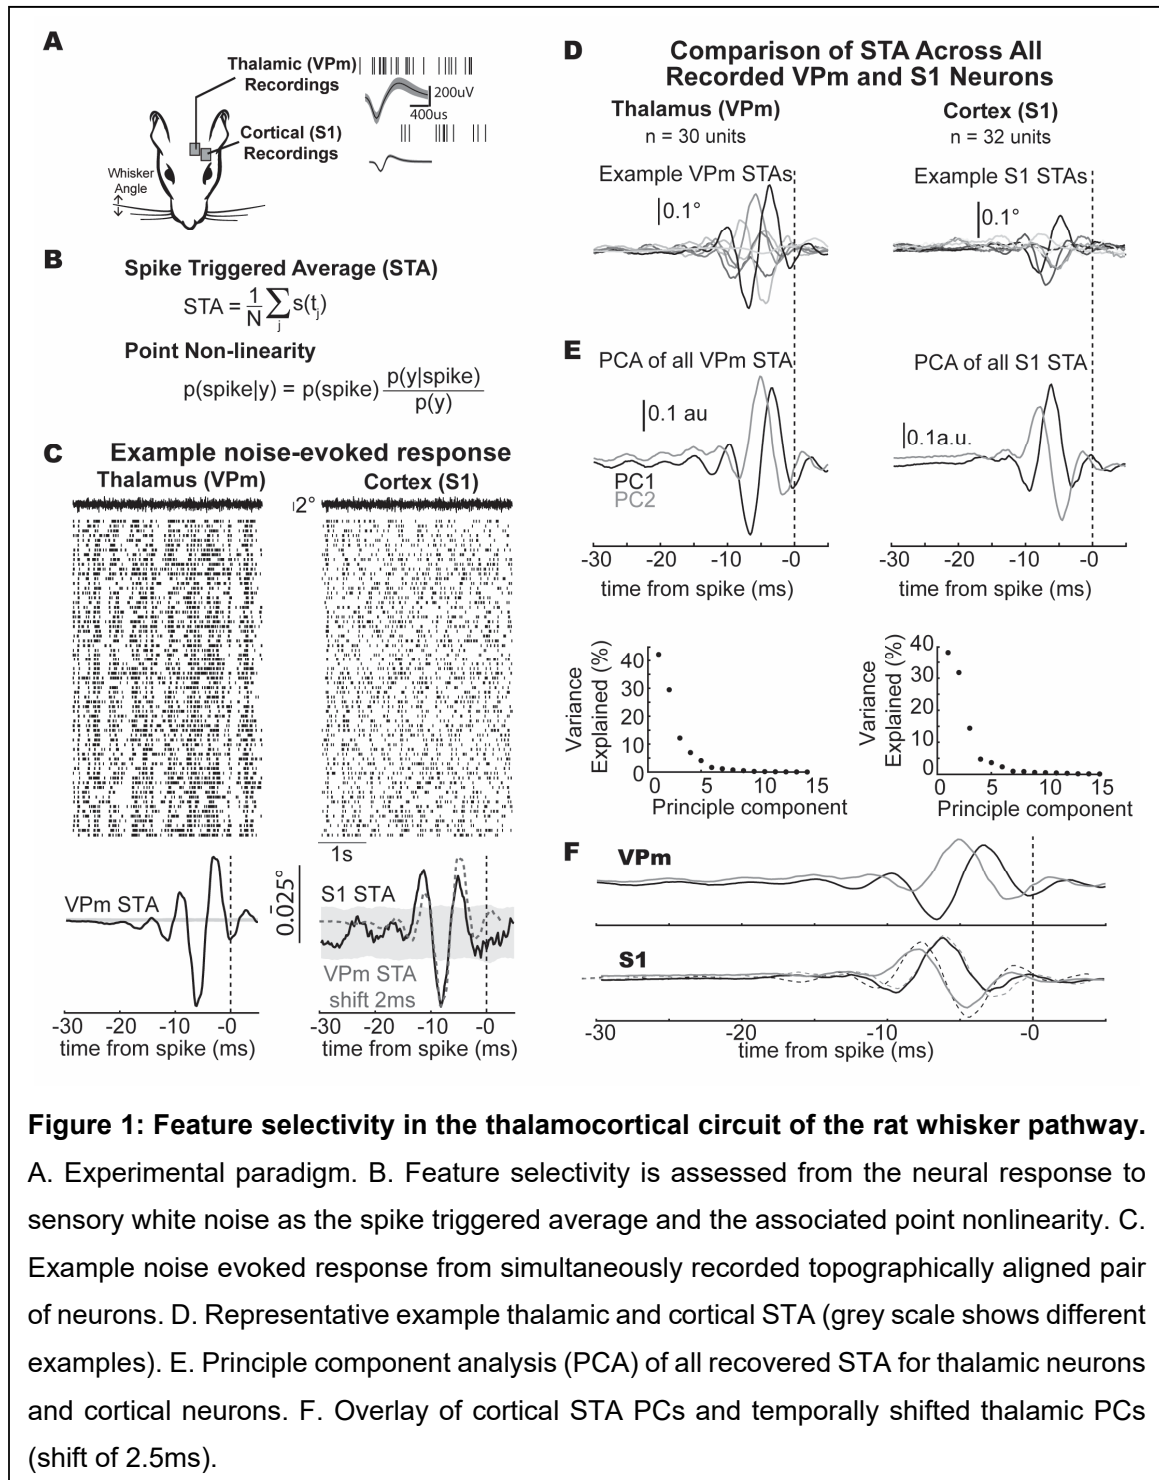

189 While this simple comparison provides an interesting observation for a single pair of  
 190 topographically aligned neurons, we also made comparisons of the feature selectivity across

191 the population of recorded STA for thalamus and cortex. First, we visualized the shape of the  
192 spike triggered average for a sample of example thalamic (Figure 1D left; greyscale) and  
193 cortical (Figure 1D right; greyscale) units. These STA filters cannot be simply averaged  
194 together to give an estimate of the population filter due to differences in the phase and  
195 directionality of the recovered STA across different recorded units. Instead, we performed a  
196 principle component analysis on the set of recovered thalamic and cortical STA filters across  
197 recordings to identify salient filter properties that generalized (Figure 1E). The first two  
198 principle components for the spike triggered averages of both thalamus and cortex explain the  
199 majority of the variance for the set of recovered filters, similar to what has been seen previously  
200 for cortex (Estebanez et al., 2012). Furthermore, a simple time shift of 2.5 milliseconds for the  
201 VPM principle components relative to the S1 principle components (Figure 1F, dashed lines)  
202 demonstrates the similarity in the STA subspace spanned by these principle components. It  
203 seems that despite not necessarily being recorded simultaneously or even in the same animal,  
204 there is a high degree of overlap in the low dimensional subspace of feature selectivity for  
205 thalamocortical neurons in the whisker pathway.

206

#### 207 Tonic and burst spike feature selectivity in thalamus

208 Inherent in the spike triggered analysis, however, is an assumption that the average  
209 filter is representative of the sensory stimulus preceding all spikes (Stanley, 2002). Yet  
210 neurons in the thalamus are well known for exhibiting two fundamentally different types of  
211 firing: tonic spiking and burst firing mediated through T-type calcium channels (Suzuki and  
212 Rogawski, 1989). Burst spikes were classified here from the extracellular recordings as two  
213 or more spikes with an inter-spike interval of less than four milliseconds with the first spike in  
214 the burst preceded by 100 milliseconds of silence (Figure 2A, see methods). Using this

215 classification, we asked if or how the feature selectivity of an individual thalamic unit changes  
 216 as a function of the spiking mechanism in the whisker pathway.

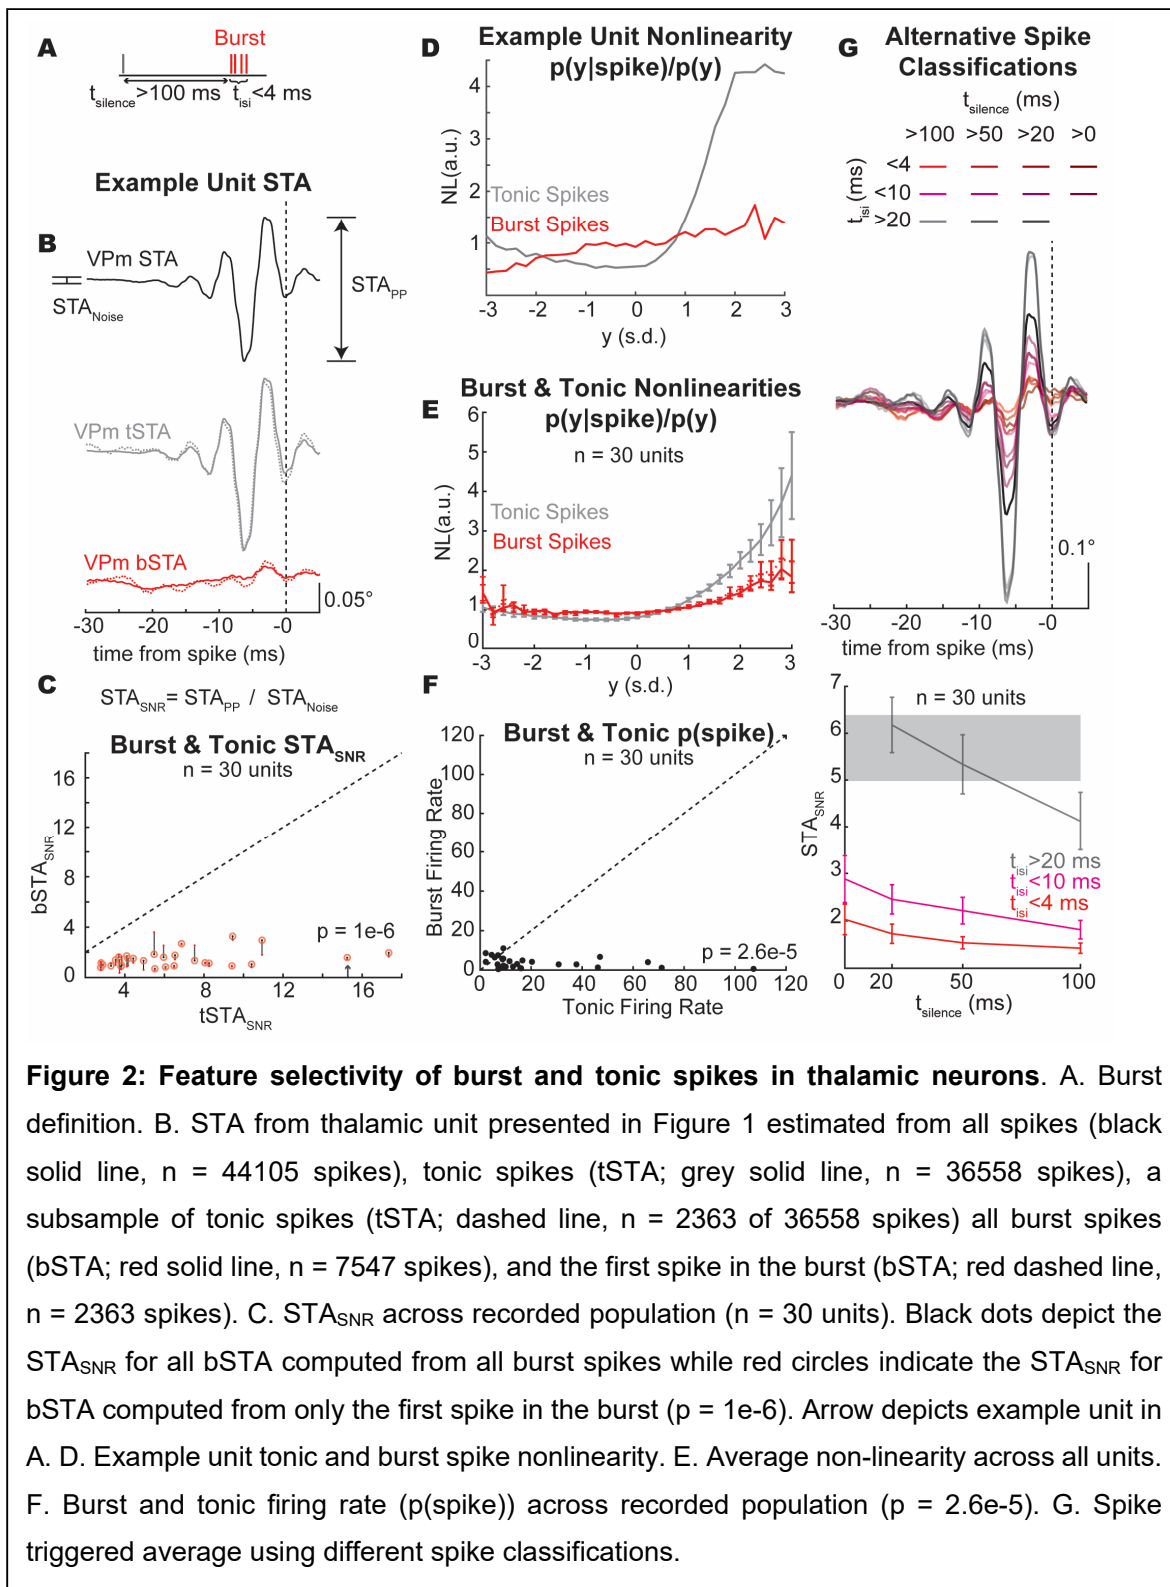

**Figure 2: Feature selectivity of burst and tonic spikes in thalamic neurons.** A. Burst definition. B. STA from thalamic unit presented in Figure 1 estimated from all spikes (black solid line,  $n = 44105$  spikes), tonic spikes (tSTA; grey solid line,  $n = 36558$  spikes), a subsample of tonic spikes (tSTA; dashed line,  $n = 2363$  of  $36558$  spikes) all burst spikes (bSTA; red solid line,  $n = 7547$  spikes), and the first spike in the burst (bSTA; red dashed line,  $n = 2363$  spikes). C.  $STA_{\text{SNR}}$  across recorded population ( $n = 30$  units). Black dots depict the  $STA_{\text{SNR}}$  for all bSTA computed from all burst spikes while red circles indicate the  $STA_{\text{SNR}}$  for bSTA computed from only the first spike in the burst ( $p = 1e-6$ ). Arrow depicts example unit in A. D. Example unit tonic and burst spike nonlinearity. E. Average non-linearity across all units. F. Burst and tonic firing rate ( $p(\text{spike})$ ) across recorded population ( $p = 2.6e-5$ ). G. Spike triggered average using different spike classifications.

217 In the thalamic recordings, tonic and burst spikes were interspersed throughout most  
218 of the recordings. For the example thalamic unit presented in Figure 1B, we computed the  
219 spike triggered average from all spikes (STA), the tonic spike triggered average from only tonic  
220 spikes (tSTA), and the burst spike triggered average from only spikes that are classified as  
221 being part of a burst (bSTA) (Figure 2B). The tSTA (grey) closely resembles the STA  
222 computed from all spikes (black) while the bSTA (red) is significantly degraded as evidenced  
223 by the flat shape of the filter. To compare the difference between burst and tonic feature  
224 selectivity across thalamic units, we quantified the signal-to-noise ratio of the STA ( $STA_{SNR}$ ,  
225 see methods). Across all thalamic units, the  $SNR_{STA}$  was higher for tonic spikes ( $tSTA_{SNR}$ ) than  
226 for burst spikes ( $bSTA_{SNR}$ ) (Figure 2C).

227 Given the estimated feature selectivity, we can compute the static non-linearity, or the  
228 input-output function, which provides a mapping between this filtered stimulus ( $y$ ) and the  
229 spiking response of the neuron ( $p(\text{spike}|y)$ ) by taking the ratio of the  $p(y|\text{spike})$  to the  $p(y)$   
230 (Figure 1B, see methods). Here, we used the tSTA as the filter for all spiking conditions when  
231 estimating the non-linearity. The probability of the filtered stimulus ( $p(y)$ ) remains unchanged  
232 when the filter is held constant. Therefore, any change in the non-linearity is then only due to  
233 changes in the probability of the filtered stimulus given that a spike occurred ( $p(y|\text{spike})$ ), or  
234 the spike triggered ensemble. Because the slope of the static non-linearity is determined by  
235 the separation between the spike triggered ensemble and the Gaussian distributed white  
236 noise, as the spike triggered ensemble distribution becomes more selective (i.e. the mean  
237 moves away from the filtered stimulus distribution), the separability of the distributions  
238 increases, and the slope of the non-linearity also increases. Intuitively, this means that the  
239 shape of the non-linearity gives an estimate of the separability of the spike triggered ensemble  
240 and the stimulus distribution, or how strongly tuned a neuron is for that particular feature, given  
241 by the STA. A steeper slope in the non-linearity suggests a stronger tuning than a shallower  
242 slope. Therefore, we also assessed the spiking nonlinearity as a function of the spike  
243 classification. In this example unit, we found that the tonic spikes were well tuned to the STA,

244 as evidenced by the steep slope of the non-linearity while the burst spikes were not well tuned  
245 to the STA, as evidenced by the relatively flat non-linearity (Figure 2D). This trend was  
246 consistent across units where the burst spikes showed reduced tuning to the STA as  
247 compared to tonic spikes as assessed by the slope of the spiking nonlinearity (Figure 2E).  
248 Here, we have separated the difference in the slope of the non-linearity from the difference in  
249 the prevalence of burst and tonic spikes ( $p(\text{spike})$ ), which is markedly higher for tonic spikes  
250 than for burst spikes (Figure 2F). Furthermore, we tested alternative burst spike classifications  
251 and quantified the implication for the STA (Figure 2G, top). Across spiking classifications,  
252 increased periods of silence prior to the spike ( $t_{\text{silence}}$ ) led to decreased  $\text{STA}_{\text{SNR}}$  while bursts of  
253 spikes ( $t_{\text{isi}} < 4$  or  $< 10$ ) had consistently lower  $\text{STA}_{\text{SNR}}$  relative to tonic spikes ( $t_{\text{isi}} > 20$ ) (Figure 2G,  
254 example unit in middle, population data in bottom). Therefore, our data do not provide  
255 evidence to support a difference in feature selectivity for tonic and burst spiking in this  
256 pathway, but instead suggests a reduction in stimulus selectivity in burst spiking within this  
257 analytic framework.

258

### 259 Thalamic state dependent feature selectivity

260 The previous analysis was conducted by presenting sensory white-noise stimuli and  
261 parsing measured thalamic spiking activity into tonic and burst classes, while these classes of  
262 spiking were intermingled throughout the recordings. However, the thalamus was in tonic firing  
263 mode, with relatively low burst firing rates (Figure 2F). Here, we used optogenetic  
264 hyperpolarization of the thalamic neurons not to silence the thalamic neurons, but instead to  
265 shift the thalamus into a burst firing mode during sensory white noise stimulation (Figure 3A).  
266 Using this optogenetic manipulation, we asked whether the optogenetically manipulated firing  
267 mode (baseline and hyperpolarized conditions) of the thalamus impacts feature selectivity and  
268 how this relates to the classified burst/tonic modes.

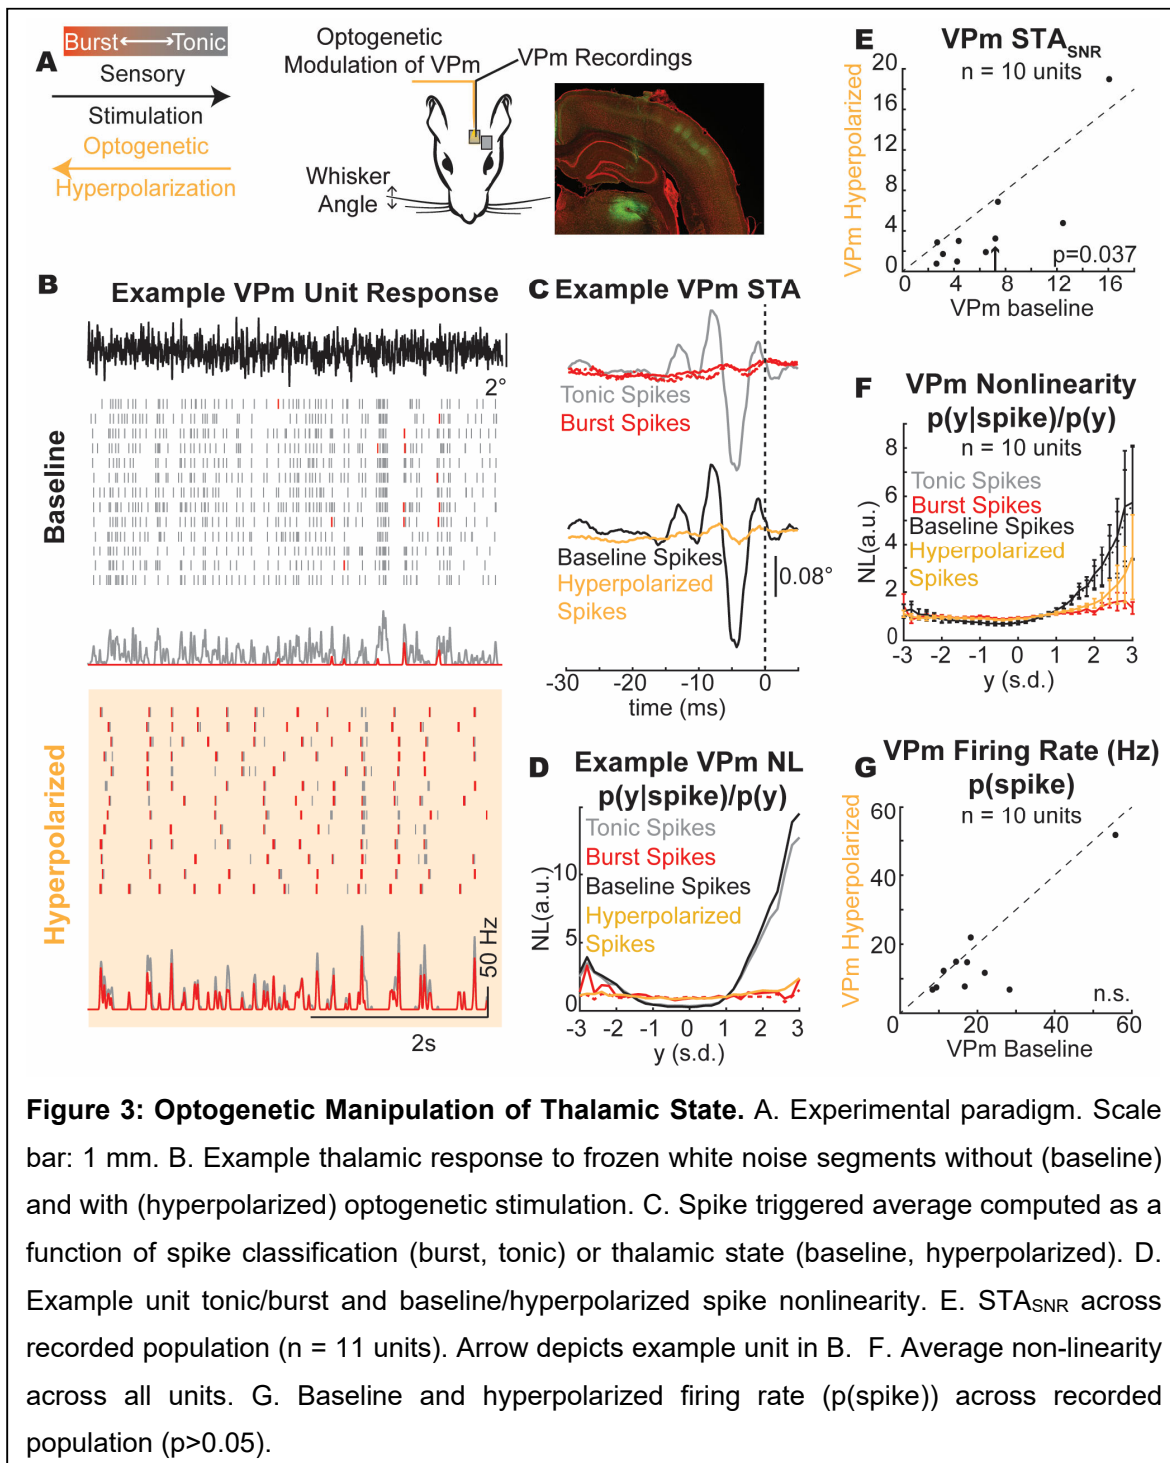

269 Here, we recorded the thalamic response to sensory white noise with and without the  
 270 presence of a light stimulus (hyperpolarized and baseline conditions, respectively) to shift the  
 271 firing mode of the thalamus towards burst firing (baseline burst ratio =  $0.16 \pm 0.15$ ,  
 272 hyperpolarized burst ratio =  $0.36 \pm 0.27$ , n = 10 units). For an example unit, we have plotted



273 the spiking response to a frozen white noise segment without optogenetic stimulation (Figure  
274 3B, baseline condition) and with optogenetic stimulation (Figure 3B, hyperpolarized condition).  
275 We have pseudocolored the tonic spikes grey and the burst spikes red to qualitatively visualize  
276 the thalamic firing mode (Figure 3B). In the baseline condition, the response is primarily tonic  
277 as evidenced by the grey raster plots (Figure 3B, Baseline, BR = 0.10). In the hyperpolarized  
278 condition (optically stimulated), the firing mode is biased towards a burst encoding scheme,  
279 as evidenced by the prevalence of red burst spikes (Figure 3B, Hyperpolarized, BR = 0.67).  
280 The tonic STA showed pronounced feature selectivity for this unit while the burst STA did not  
281 (Figure 3C top), consistent with the earlier findings (Figure 2). In the optogenetically  
282 manipulated states, the baseline STA has prominent feature selectivity while the  
283 hyperpolarized condition is much smaller in amplitude (Figure 3C bottom). Qualitatively, we  
284 can see that the STA from hyperpolarized condition reflected the STA obtained from the burst  
285 spiking in the previous analysis.

286         The similarity between the burst spike response and hyperpolarized condition can also  
287 be seen in this example nonlinearity where the burst and hyperpolarized nonlinearities are  
288 effectively flat while the tonic spikes and baseline condition show obvious tuning (Figure 3D).  
289 Across units, we found an overall reduction in the  $STA_{SNR}$  for the hyperpolarized condition  
290 relative to the baseline condition (Figure 3E,  $p = 0.037$ ). We also found that the tuning of the  
291 nonlinearity was lower for the hyperpolarized condition relative to the baseline condition as  
292 reflected in the overall gain/slope (Figure 3F). Importantly, the baseline and hyperpolarized  
293 conditions both contain burst and tonic spikes. Instead of completely separating the firing  
294 modes into all burst spikes or all tonic spikes, we have optogenetically altered the spiking  
295 probabilities such that the baseline condition has more tonic spikes and the hyperpolarized  
296 condition has more burst spikes while maintaining similar numbers of spikes (Figure 3G). The  
297 similarities between the STA and the NL properties of the burst and hyperpolarized state as  
298 well as the tonic and baseline state suggest that there was no discernable difference for the



299 estimation of feature selectivity when assessed based on the state of the thalamus at the time  
300 of the stimulus (hyperpolarized/baseline) versus the spike type classification (burst/tonic).

301

### 302 Temporal precision of thalamic firing modes

303         Given the difference between the recovered estimates of burst/hyperpolarized and  
304 tonic/baseline feature selectivity, we implemented a series of computational controls to identify  
305 any potential shortcomings of the methodologies that could underlie these results. The first  
306 issue we considered was whether or not the burst spike feature selectivity was unrecoverable  
307 due to the effect of subsequent spikes in the burst. If the timing of spikes within a burst is not  
308 repeatable and structured, the presence of these additional spikes will serve to destroy the  
309 temporal structure in the feature selectivity as revealed by the spike triggered analysis. When  
310 the bSTA was computed from only the first spike in each burst (Figure 2B, red-dashed line),  
311 there was no apparent feature selectivity for this example unit. This can also be visualized  
312 across units in the  $STA_{SNR}$  where the  $bSTA_{SNR}$  is plotted when computed from all burst spikes  
313 (black dot) and when computed from the first spike in each burst (red circle, Figure 2C).  
314 Therefore, including all spikes in a burst (or not) does not strongly impact the ability to estimate  
315 the feature selectivity from the STA.

316         The second issue we considered was the overall difference in spike rates. Spike  
317 triggered analyses require a large number of spikes to effectively estimate the underlying  
318 selectivity. The proportion of spikes classified as bursts was lower than the spikes classified  
319 as tonic (Figure 2F) as quantified by the burst and tonic firing rate. Therefore, it was possible  
320 that we could not recover an STA for the burst spike condition due to the reduced number of  
321 burst spikes relative to tonic spikes. In an example unit, we computed the tSTA using only a  
322 subset of the spikes ( $n = 2362$  of 36558 spikes corresponding to  $n = 2363$  bursts with  $n =$   
323 7547 burst spikes) and found that the linear filter was essentially identical to the tSTA (Figure  
324 2B, grey dashed line). We computed this for all thalamic units and again found that the burst-  
325 count matched tSTA was also significantly larger than the bSTA. Furthermore, there was no

326 statistically significant difference in the firing rate between the baseline and hyperpolarized  
327 optogenetic conditions (Figure 3G), but still the difference in the STA persisted. This suggests  
328 that simple spike counts alone were insufficient to explain the difference in the tonic/baseline  
329 STA and the burst/hyperpolarized STA.

330         The third issue we considered was the inherent assumption that the feature selectivity  
331 for each unit could be recovered as the STA. It was possible that the burst STA was not  
332 recoverable because the burst firing mode was better estimated by a symmetric nonlinearity  
333 and therefore the filter could only be recovered using spike triggered covariance (STC)  
334 techniques. We therefore computed the STC for all recorded thalamic units and compared this  
335 for each spiking condition. Although the dataset was more limited because the number of units  
336 with a significant STC filter was lower than those with a significant STA filter (n = 13 units with  
337 STC filter compared to n = 30 units with STA filter), the same trends regarding the reduction  
338 in the amplitude of the filter ( $STC_{SNR}$ ) and the slope of the symmetric nonlinearity persisted  
339 (data not shown). Therefore, this suggests that the method of extracting the feature selectivity  
340 (STA compared to STC) was insufficient to explain the inability to estimate the feature  
341 selectivity in the hyperpolarized/burst spiking conditions.

342         The fourth assumption made throughout the analysis was that burst spikes are actually  
343 driven by sensory stimuli such that there is a recoverable burst spike feature selectivity. The  
344 alternative explanation would be that burst spikes are not feature selective and instead occur  
345 randomly due to intrinsic or other non-sensory processes. To assess this, we quantified the  
346 trial-to-trial repeatability for bursts in response to frozen white noise segments. As can be seen  
347 in Figure 3B, the qualitative assessment of temporally aligned bursts in response to the frozen  
348 white noise segment suggests that the bursts are driven by the sensory stimulus in a  
349 repeatable way. For units with a sufficient number of repeated trials, we computed the  
350 reliability of the burst spiking as the correlation between the peristimulus time histogram of  
351 even and odd trials in response to the frozen white noise segment. We found that all units  
352 showed greater reliability than what is expected based on just the temporal correlations in the

353 burst spiking (shuffle control,  $p = 0.002$ ,  $n = 10$  thalamic units). This suggests that the bursts  
354 are not randomly generated or due entirely to a non-stimulus related phenomenon.

355 From these controls, we propose that the difference in the spike triggered encoding  
356 properties could not be attributed to differences in the overall spike rates, the temporal  
357 properties of the spikes within the burst, or the mechanism of filter estimation. Instead, we  
358 propose that the burst spikes are driven by the sensory stimulus and have an underlying  
359 feature selectivity, but that this cannot be recovered using spike triggered techniques due to  
360 the reduced temporal precision of burst spiking relative to tonic spikes.

361 Recovering an STA relies on precise temporal spiking relative to the sensory stimulus.  
362 To simulate degradation of the spike timing precision, we added independent samples of  
363 normally distributed temporal jitter of varying amplitudes (standard deviation of the jitter  
364 distribution) to each tonic spike for an example unit and computed the STA (Figure 4A).  
365 Across units, we quantified the degradation of the STA as the jittered- $STA_{SNR}$  normalized by  
366 the  $tSTA_{SNR}$  (0 ms jitter). The jittered- $STA_{SNR}$  (black) is within the band expected for the  
367  $bSTA_{SNR}$  with the addition of 4 milliseconds of jitter to the spike times (red shaded, Figure 4A,  
368 right). We propose that the effects of temporal jitter are particularly evident for whisker  
369 selectivity, presumably due to the short temporal duration of the filters (approximately 10-15  
370 milliseconds in duration, Figure 1F).

371 Given the marked effects of jitter on the ability to recover the STA, we investigated the  
372 variability in the spike timing relative to the noise stimulus (Figure 4B). For this example unit,  
373 we have identified a segment in the noise stimulus that closely resembles the tonic STA for  
374 this unit and elicits a reliable spiking response (Figure 4B, top; stimulus – black,  $tSTA$  – grey  
375 dashed). The vertical dashed line indicates the spike time for the spike triggered average ( $t_0$ )  
376 with the grey bar indicating the duration of the STA. If there was no variability in the neural  
377 spiking, the raster plots would all be perfectly aligned to  $t_0$  because the similarity between the  
378 stimulus and the STA would predict a spiking response at that time point. However, the timing  
379 of evoked neural responses is always variable to some extent and this can be visualized for

380 this example response segment as the temporal variability of the spike times surrounding this  
381 stimulus feature in the noise stimulus (Figure 4B, as indicated by the grey stimulus bars that  
382 extend from the first spike response to this particular sensory feature). For this example  
383 snapshot, it is also apparent that the burst spikes in the hyperpolarized condition show greater  
384 temporal variability than the tonic spikes in the baseline condition.

385 To quantify this jitter across all spikes, we developed a  $\tau_{\text{jitter}}$  metric that determines the  
386 time lag of the peak correlation between the STA and the stimulus segment ( $s(t_j)$ ) surrounding  
387 each spike (Figure 4C). Intuitively, this is a correlative method to identify the time lag between  
388 when we predict a spike is most likely to occur based on the STA and the stimulus (peak  
389 correlation) and when the spike actually occurred. For this analysis, we treated the tSTA as  
390 the true feature selectivity of the neuron across all spiking conditions because we could not  
391 recover a reliable estimate of the bSTA.

392 We computed  $\tau_{\text{jitter}}$  for each spike and plotted  $\tau_{\text{jitter}}$  distributions for each spike condition  
393 (tonic, burst, baseline, hyperpolarized). If a neuron was infinitely precise such that when the  
394 stimulus matched the spike triggered average, the neuron fired a spike without delay, this  
395 distribution would be represented by a delta function at  $\tau_{\text{jitter}}$  equals zero. As the variability of  
396 the timing increases, the width of this distribution will also increase. For the tonic and baseline  
397 condition spikes, we found a clear peak in  $\tau_{\text{jitter}}$  values at  $\tau_{\text{jitter}}$  equals zero (Figure 4C, grey,  
398 black). For the burst and hyperpolarized condition spikes, we observe little-to-no peak in the  
399  $\tau_{\text{jitter}}$  metric at zero (Figure 4C, red, yellow). We computed the  $\tau_{\text{jitter}}$  distribution across all  
400 thalamic units and found that the tonic and baseline spikes had higher peaks at  $\tau_{\text{jitter}}$  equals  
401 zero than the burst and hyperpolarized spike conditions (Figure 4D). We quantified this  
402 statistically by computing a precision metric (Figure 4C) that computes the proportion of spikes  
403 within  $\pm 1$  millisecond of  $\tau_{\text{jitter}}$  equals zero (Figure 4E). The tonic and baseline spike condition  
404 were more precise than burst and hyperpolarized conditions.

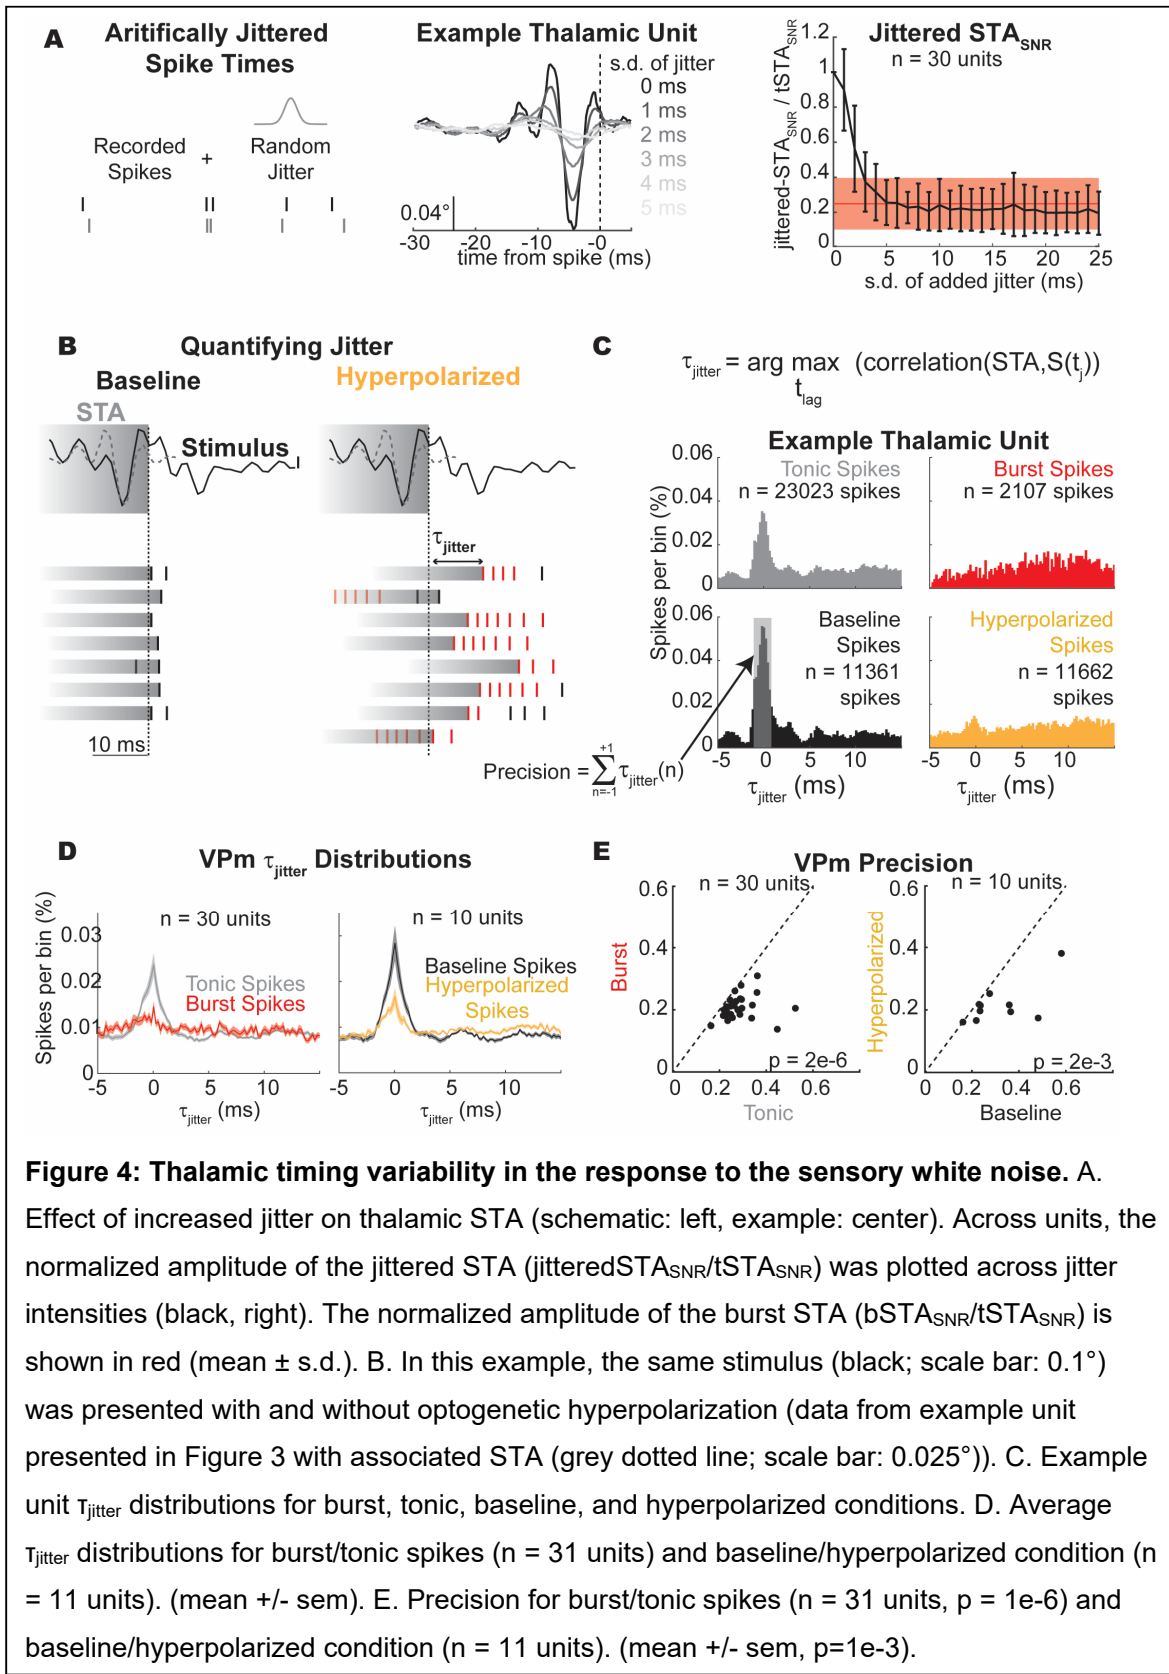

406           These data suggest that tonic spikes showed greater temporal precision in response  
407 to the sensory white noise than burst spikes and that this could underlie the difference in the  
408 recoverability of the feature selectivity in the thalamus between firing modes. It is well  
409 established that the timing of sensory inputs is particularly important in the thalamocortical  
410 circuit such that changes in thalamic spike timing could have large impacts on the downstream  
411 representation of sensory information in the cortex. Next, we investigated how these changes  
412 in temporal precision in optogenetically modulated thalamic states impact cortical encoding  
413 properties.

414

415 Optogenetic modulation of thalamic firing modes directly impacts cortical representation of  
416 sensory information.

417           Cortical neurons that receive direct thalamic input are integrating information over a  
418 population of thalamocortical neurons that can be operating in different firing modes. This  
419 makes it difficult to determine the impact of a single burst from a single neuron on information  
420 representation in the pathway. Instead, we used the optogenetic manipulation of thalamic state  
421 as presented in Figure 3 to bias the activity of the thalamic population towards burst firing  
422 (hyperpolarized condition) and investigated the effects on the cortex. Here, we transfected the  
423 thalamus with a hyperpolarizing opsin and lowered an optic fiber into the thalamus while  
424 recording the cortical activity extracellularly (Figure 5A) in response to sensory white noise  
425 with and without optogenetic manipulation of the thalamus (hyperpolarized VPm, baseline  
426 VPm).

427 For an example unit, we have plotted the cortical STA in the baseline and  
 428 hyperpolarized VPM conditions (Figure 5B). Here, the amplitude of the cortical STA was  
 429 smaller when the thalamus is hyperpolarized compared to when it is not (Figure 5B). This  
 430 cortical unit also shows a reduced tuning to the STA when the thalamus was hyperpolarized  
 431 (Figure 5C). Across the population of recorded cortical neurons, we saw the same effect seen  
 432 in this example neuron of a reduced  $STA_{SNR}$  when the VPM was hyperpolarized compared to

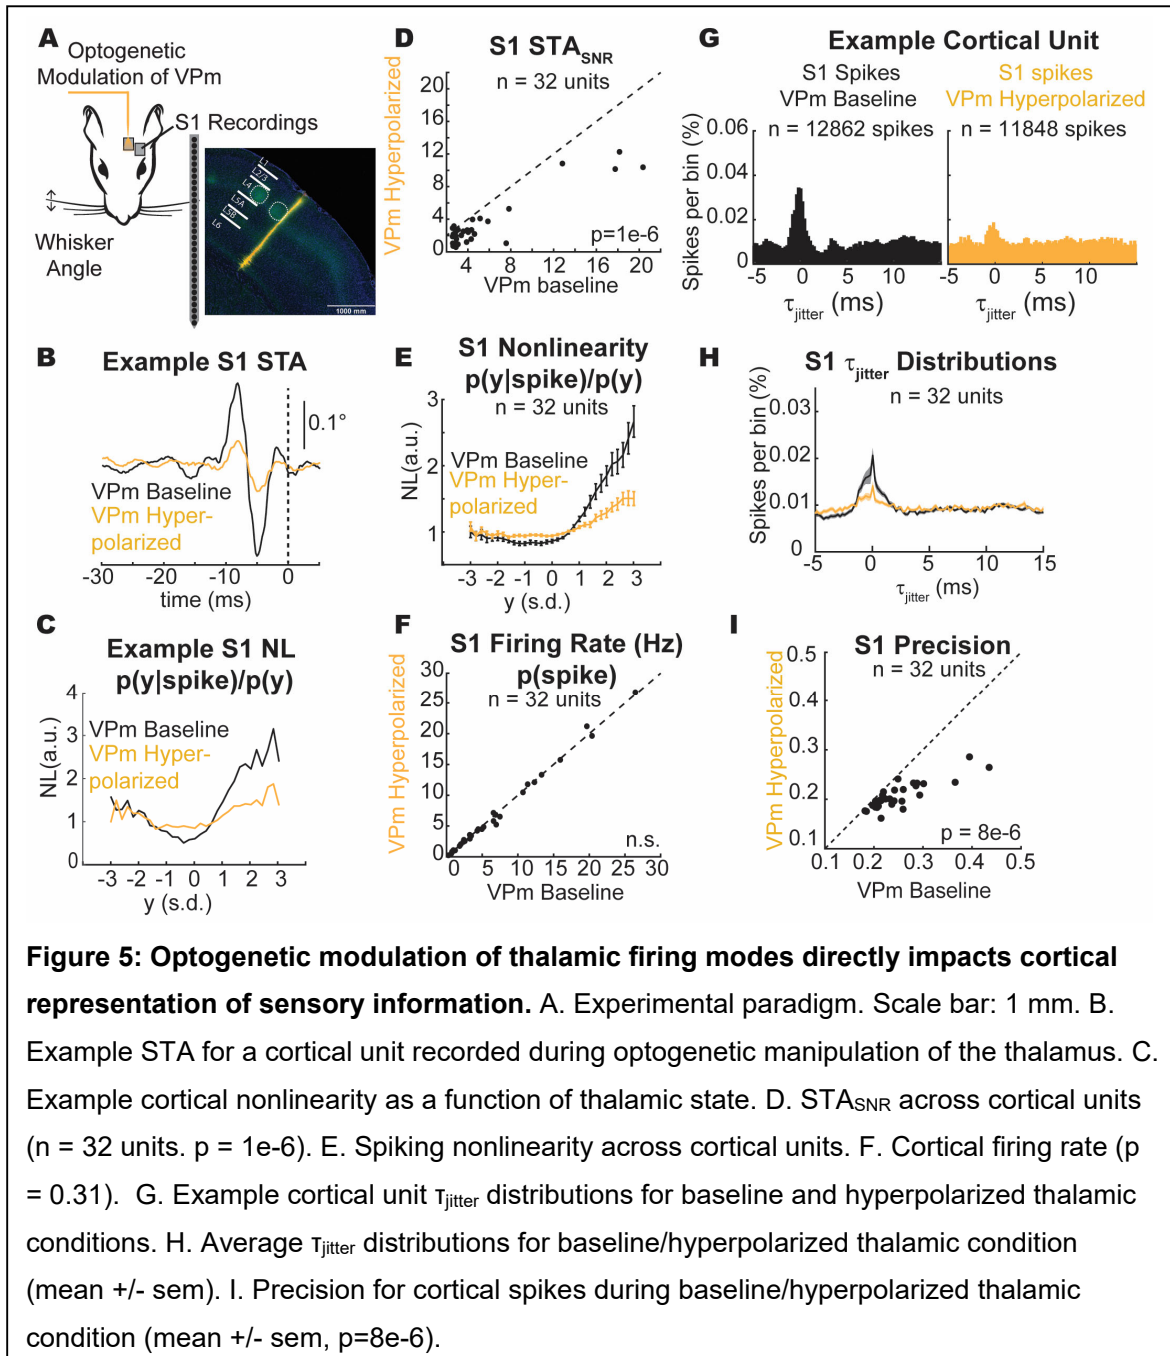

433 when it was not (Figure 5D) and a reduction in the tuning across all cortical units as quantified  
434 by the spiking nonlinearity (Figure 5E). These findings mirror what was seen for thalamic  
435 neurons when comparing the baseline and the optogenetically manipulated conditions  
436 demonstrating that the changes in thalamic encoding properties are propagated to cortex.

437 Interestingly, there was no significant difference in the noise-evoked firing rate in the  
438 cortex as a function of the VPm condition (Figure 5F). This suggests that it was not overall  
439 spike counts influencing the cortical feature selectivity. Instead, we propose the temporal jitter  
440 in the thalamic spiking patterns propagated to cortex. We investigated the temporal precision  
441 of the cortical spiking in response to the sensory white noise using the same methodology  
442 employed for the thalamus. As we saw for the thalamus, the cortical spikes from this example  
443 unit also showed greater temporal precision in the baseline VPm condition compared to the  
444 hyperpolarized VPm condition (Figure 5G) as evidenced by the peak in the  $\tau_{\text{jitter}}$  distribution  
445 around  $\tau_{\text{jitter}}$  equals zero. This effect was consistent across the population of recorded cortical  
446 units (Figure 5H) and showed significant differences in the precision of the cortical firing  
447 (Figure 5I). This suggests that the temporal jitter present in the thalamus is transmitted to the  
448 cortex where it also impacts the representation of sensory information.

449



## 450 **Discussion**

451           The highly interconnected thalamocortical pathway dynamically gates information flow  
452 between the periphery and higher cortical centers dependent on many factors including  
453 behavioral state (Niell and Stryker, 2010), task demands (Atiani et al., 2009), and sensory  
454 adaptation state (Whitmire et al., 2016). Although there have been extensive investigations  
455 into the cortical state-dependent processing of the thalamocortical circuit, we know  
456 surprisingly little about how this information is processed in a thalamic state-dependent  
457 manner. Here, using a combination of optogenetic stimulation and electrophysiological  
458 recording techniques, we have performed a series of experiments modulating the state of the  
459 thalamus (through constant optogenetic hyperpolarization) and quantified the effects on  
460 encoding in the thalamocortical circuit. Using this technique, we have coarse control of the  
461 firing mode in thalamus without altering the processing occurring from the whisker to thalamus,  
462 enabling us to decouple the changes in thalamic firing mode on thalamocortical processing  
463 from changes occurring in subthalamic processing. We found that, unlike the visual pathway,  
464 the feature selectivity of burst spikes in the vibrissa pathway could not be recovered using  
465 spike triggered techniques due to increased burst spike timing variability relative to tonic spike  
466 timing. Recordings from barrel cortex during optogenetic manipulation of thalamic state  
467 demonstrated a shift in the temporal precision of the cortical spiking that also led to a  
468 degradation of the recovered feature selectivity. This suggests that bursts in the whisker  
469 pathway are less precise than tonic spikes during ongoing sensory stimulation and that this  
470 loss of temporal precision is propagated to cortex.

471           These results could be interpreted as consistent with the view that bursts are not  
472 representing detailed stimulus information. However, there is evidence that bursts may convey  
473 more information than the presence or absence of a burst through inter-burst spike timing and  
474 the number of spikes per burst (Mease et al., 2017), suggesting a role of temporally precise  
475 burst firing in information representation. Furthermore, thalamic bursting can be temporally  
476 precise within and across neurons in response to high intensity whisker stimuli (Whitmire et

477 al., 2016). Instead, we propose that the temporal precision of the thalamic firing is a function  
478 of both the state of the thalamus and the intensity of the sensory stimulus. It has previously  
479 been shown that the temporal precision of thalamic encoding increases with the intensity of  
480 the sensory stimulus (Desbordes et al., 2008; Whitmire et al., 2016) while here we have shown  
481 that the temporal precision of the thalamic firing decreases with sustained hyperpolarization.  
482 These two competing factors would enable the burst firing mode to encode high amplitude  
483 stimuli in a temporally precise fashion while low amplitude stimuli, such as the sensory white  
484 noise presented here, would not be able to overcome the variability present in the burst state.

485         There are multiple mechanisms that could underlie the reduced temporal precision in  
486 the burst firing mode including variability introduced by the slow dynamics of the calcium  
487 depolarization, increased variability in the time to reach threshold due to the prolonged  
488 hyperpolarization of the baseline polarization, as well as potential changes in the integration  
489 properties of the thalamic neurons. Furthermore, these mechanisms could occur  
490 independently such that the variability across neurons is uncorrelated or these mechanisms  
491 could be coordinated in some way to enable correlated variability across the thalamic  
492 population. Both coordinated and uncoordinated jitter would have a detrimental effect on the  
493 ability to recover the STA because either the spike timing would no longer be locked to the  
494 stimulus itself or the input to the cortex would be temporally imprecise. However, coordinated  
495 jitter would maintain the information about the stimulus while uncoordinated jitter would  
496 degrade the recoverability of the stimulus features. Future work should investigate the jitter in  
497 the burst spiking across units to determine whether or not the variability in the spike timing is  
498 coordinated across thalamic units in this context.

499         Given the importance of thalamic spike timing precision within and across neurons in  
500 transmitting information downstream to cortex (Bruno and Sakmann, 2006; Wang et al., 2010),  
501 alterations to thalamic state can shape multiple properties of the spiking inputs to cortex.  
502 Manipulation of the thalamic state can lead to changes in the stimulus evoked cortical  
503 dynamics (Whitmire et al., 2017) and spatiotemporal cortical activation (Borden et al., 2017).

504 We have primarily considered thalamic state-dependent encoding as a feedforward  
505 representation from thalamus to cortex, but the highly interconnected thalamocortical circuitry  
506 is a dynamic interaction that shapes coding properties in both feedforward and feedback  
507 manner. Changes in thalamic activity impact cortical activity which then provides feedback to  
508 thalamus to further alter activity (Crandall et al., 2015; Mease et al., 2014; Poulet et al., 2012;  
509 Reinhold et al., 2015; Wimmer et al., 2015). It is possible for thalamus to influence cortical  
510 state and for the cortex to influence thalamic state, but how this plays out during natural  
511 behaviors is not yet known and must be decoupled using more sophisticated techniques such  
512 as closed-loop control of neural activity (Bolus et al., 2018; Newman et al., 2015). The ability  
513 to shift the temporal precision of the thalamic spike timing through changes to the thalamic  
514 state, or the baseline membrane potential, provides a biophysical mechanism for the thalamus  
515 to gate information flow to cortex. Furthermore, this mechanism could be under both  
516 feedforward and feedback control. This sets the stage for a dynamic interaction between  
517 thalamic and cortical states to drive highly interactive patterns of neural activity.

518 **References**

- 519 Alitto HJ, Weyand T, Usrey WM. 2005. Distinct Properties of Stimulus-Evoked Bursts in the  
520 Lateral Geniculate Nucleus. *J Neurosci* **25**:514–523. doi:10.1523/JNEUROSCI.3369-  
521 04.2005
- 522 Atiani S, Elhilali M, David S V., Fritz JB, Shamma SA. 2009. Task Difficulty and Performance  
523 Induce Diverse Adaptive Patterns in Gain and Shape of Primary Auditory Cortical  
524 Receptive Fields. *Neuron* **61**:467–480. doi:10.1016/j.neuron.2008.12.027
- 525 Bolus MF, Willats AA, Whitmire CJ, Rozell CJ, Stanley GB. 2018. Design strategies for  
526 dynamic closed-loop optogenetic neurocontrol in vivo. *J Neural Eng* **15**:026011.  
527 doi:10.1088/1741-2552/aaa506
- 528 Borden PY, Kolb I, Ortiz AD, Sederberg AJ, Stoy W, Forest CR, Morrissette AE, Jaeger D,  
529 Stanley GB. 2017. Thalamic control of sensory evoked spatiotemporal cortical  
530 responses.2017 Neuroscience Meeting Planner. Washington, DC: Society for  
531 Neuroscience, 2017. Online. p. 583.04.
- 532 Bruno RM, Sakmann B. 2006. Cortex is driven by weak but synchronously active  
533 thalamocortical synapses. *Science* **312**:1622–7. doi:10.1126/science.1124593
- 534 Castro-alamancos MA. 2002. Properties of primary sensory (lemniscal) synapses in the  
535 ventrobasal thalamus and the relay of high-frequency sensory inputs. *J Neurophysiol*  
536 946–953.
- 537 Crandall SR, Cruikshank SJ, Connors BW, Crandall SR, Cruikshank SJ, Connors BW. 2015.  
538 A Corticothalamic Switch: Controlling the Thalamus with Dynamic Synapses. *Neuron*  
539 **86**:1–15. doi:10.1016/j.neuron.2015.03.040
- 540 Denning KS, Reinagel P. 2005. Visual Control of Burst Priming in the Anesthetized Lateral  
541 Geniculate Nucleus. *J Neurosci* **25**:3531–3538. doi:10.1523/JNEUROSCI.4417-  
542 04.2005

- 543 Desbordes G, Jin J, Weng C, Lesica NA, Stanley GB, Alonso J. 2008. Timing precision in  
544 population coding of natural scenes in the early visual system. *PLoS Biol* **6**:e324.  
545 doi:10.1371/journal.pbio.0060324
- 546 Estebanez L, Boustani S EI, Destexhe A, Shulz DE. 2012. Correlated input reveals  
547 coexisting coding schemes in a sensory cortex. *Nat Neurosci* **15**:1–14.  
548 doi:10.1038/nn.3258
- 549 Guido W, Weyand T. 1995. Burst responses in thalamic relay cells of the awake behaving  
550 cat. *J Neurophysiol* **74**:1782–1786.
- 551 Lesica NA, Jin J, Weng C, Yeh C-I, Butts D a, Stanley GB, Alonso J-M. 2007. Adaptation to  
552 stimulus contrast and correlations during natural visual stimulation. *Neuron* **55**:479–91.  
553 doi:10.1016/j.neuron.2007.07.013
- 554 Lesica NA, Stanley GB. 2004. Encoding of natural scene movies by tonic and burst spikes in  
555 the lateral geniculate nucleus. *J Neurosci* **24**:10731–40.  
556 doi:10.1523/JNEUROSCI.3059-04.2004
- 557 Martinez-Conde S, Macknik SL, Hubel DH. 2002. The function of bursts of spikes during  
558 visual fixation in the awake primate lateral geniculate nucleus and primary visual cortex.  
559 *Proc Natl Acad Sci* **99**:13920–13925. doi:10.1073/pnas.212500599
- 560 McFarland JM, Cui Y, Butts D a. 2013. Inferring nonlinear neuronal computation based on  
561 physiologically plausible inputs. *PLoS Comput Biol* **9**:e1003143.  
562 doi:10.1371/journal.pcbi.1003143
- 563 Mease RA, Krieger P, Groh A. 2014. Cortical control of adaptation and sensory relay mode  
564 in the thalamus. *Proc Natl Acad Sci U S A* **111**:6798–803.  
565 doi:10.1073/pnas.1318665111
- 566 Mease RA, Kuner T, Fairhall AL, Groh A. 2017. Multiplexed Spike Coding and Adaptation in  
567 the Thalamus. *Cell Rep* **19**:1130–1140. doi:10.1016/j.celrep.2017.04.050

- 568 Newman JP, Fong M-F, Millard DC, Whitmire CJ, Stanley GB, Potter SM. 2015. Optogenetic  
569 feedback control of neural activity. *Elife* 1–24. doi:10.7554/eLife.07192
- 570 Niell CM, Stryker MP. 2010. Modulation of visual responses by behavioral state in mouse  
571 visual cortex. *Neuron* **65**:472–9. doi:10.1016/j.neuron.2010.01.033
- 572 Petersen RS, Brambilla M, Bale MR, Alenda A, Panzeri S, Montemurro M a, Maravall M.  
573 2008. Diverse and temporally precise kinetic feature selectivity in the VPM thalamic  
574 nucleus. *Neuron* **60**:890–903. doi:10.1016/j.neuron.2008.09.041
- 575 Poulet JFA, Fernandez LMJ, Crochet S, Petersen CCHH. 2012. Thalamic control of cortical  
576 states. *Nat Neurosci* **15**:370–2. doi:10.1038/nn.3035
- 577 Quiroga RQ, Nadasdy Z, Ben-Shaul Y. 2004. Unsupervised spike detection and sorting with  
578 wavelets and superparamagnetic clustering. *Neural Comput* **16**:1661–1687.  
579 doi:10.1162/089976604774201631
- 580 Reinagel P, Godwin D, Sherman SM, Koch C. 1999. Encoding of visual information by LGN  
581 bursts. *J Neurophysiol* 2558–2569.
- 582 Reinhold K, Lien AD, Scanziani M. 2015. Distinct recurrent versus afferent dynamics in  
583 cortical visual processing. *Nat Neurosci* **18**. doi:10.1038/nn.4153
- 584 Rossant C, Kadir SN, Goodman DFM, Schulman J, Belluscio M, Buzsáki G, Harris KD,  
585 Hunter MLD, Saleem AB, Grosmark A, Denfield GH, Ecker ASS, Tolias AS, Solomon  
586 SG, Carandini M, Belluscio M, Denfield GH, Ecker ASS, Tolias AS, Solomon SG,  
587 Buzsáki G, Carandini M, Harris KD. 2015. Spike sorting for large, dense electrode  
588 arrays. *Nat Neurosci* 015198. doi:10.1038/nn.4268
- 589 Schwartz O, Pillow JW, Rust NC, Simoncelli EP. 2006. Spike-triggered neural  
590 characterization. *J Vis* **6**:484–507. doi:10.1167/6.4.13
- 591 Stanley GB. 2002. Adaptive spatiotemporal receptive field estimation in the visual pathway.  
592 *Neural Comput* **14**:2925–2946. doi:10.1162/089976602760805340

- 593 Steriade M, McCormick DA, Sejnowski TJ. 1993. Thalamocortical oscillations in the sleeping  
594 and aroused brain. *Science* **262**:679–685. doi:10.1126/science.8235588
- 595 Suzuki S, Rogawski MA. 1989. T-type calcium channels mediate the transition between tonic  
596 and phasic firing in thalamic neurons. *Proc Natl Acad Sci U S A* **86**:7228–7232.  
597 doi:10.1073/pnas.86.18.7228
- 598 Swadlow HA, Gusev AG. 2001. The impact of “bursting” thalamic impulses at a neocortical  
599 synapse. *Nat Neurosci* **4**:402–8. doi:10.1038/86054
- 600 Wang Q, Webber RM, Stanley GB. 2010. Thalamic synchrony and the adaptive gating of  
601 information flow to cortex. *Nat Neurosci* **13**:1534–41. doi:10.1038/nn.2670
- 602 Wang X, Wei Y, Vaingankar V, Wang Q, Koepsell K, Sommer FT, Hirsch J a. 2007.  
603 Feedforward Excitation and Inhibition Evoke Dual Modes of Firing in the Cat’s Visual  
604 Thalamus during Naturalistic Viewing. *Neuron* **55**:465–478.  
605 doi:10.1016/j.neuron.2007.06.039
- 606 Whitmire CJ, Millard DC, Stanley GB. 2017. Thalamic state control of cortical paired-pulse  
607 dynamics. *J Neurophysiol* **117**:jn 00415 2016. doi:10.1152/jn.00415.2016
- 608 Whitmire CJ, Waiblinger C, Schwarz C, Stanley GB. 2016. Information Coding through  
609 Adaptive Gating of Synchronized Thalamic Bursting. *CellReports* **14**:1–13.  
610 doi:10.1016/j.celrep.2015.12.068
- 611 Wimmer RD, Schmitt LI, Davidson TJ, Nakajima M, Deisseroth K, Halassa MM. 2015.  
612 Thalamic control of sensory selection in divided attention. *Nature*.  
613 doi:10.1038/nature15398
- 614 Wolfart J, Debay D, Le Masson G, Destexhe A, Bal T. 2005. Synaptic background activity  
615 controls spike transfer from thalamus to cortex. *Nat Neurosci* **8**:1760–7.  
616 doi:10.1038/nn1591
- 617
